# Supplementary material for: Margin Free Resection Achieves Excellent Long Term Outcomes in Parathyroid Cancer
Source: MDPI journal article supplement (doi:10.3390/cancers15010199), 2022-12-29
Supplement: s1 [file s1]

Supplementary Table S1: Patient cohort - treatment and outcome data

| patient         | gender | age at diagnosis | year of 1 <sup>st</sup> op | initial surgery | RLN resection | resection margin | adjuvant therapy | local recurrence after 1 <sup>st</sup> surgery | time to local recurrence | Year of 2 <sup>nd</sup> op | local recurrence after 2 <sup>st</sup> surgery | adjuvant therapy | distant metastases | time to distant metastases | death due to disease | overall follow-up (months) | histology | level VI (+/total) | level II-V (+/total) |
|-----------------|--------|------------------|----------------------------|-----------------|---------------|------------------|------------------|------------------------------------------------|--------------------------|----------------------------|------------------------------------------------|------------------|--------------------|----------------------------|----------------------|----------------------------|-----------|--------------------|----------------------|
| 15              | F      | 63               | 1996                       | LE              | No            | R1               | no               | No                                             | --                       | --                         | --                                             | no               | No                 | --                         | No                   | 318                        | LR        | nd                 | nd                   |
| 5               | F      | 62               | 2005                       | EB              | No            | R0               | no               | no                                             | --                       | --                         | --                                             | no               | no                 | --                         | no                   | 202                        | HR        | 0/2                | nd                   |
| 7               | F      | 67               | 2006                       | EB              | No            | R0               | no               | no                                             | --                       | --                         | --                                             | no               | no                 | --                         | no                   | 185                        | HR        | 0/1                | nd                   |
| 2               | M      | 66               | 2006                       | EB              | Yes           | R1               | no               | Yes                                            | 13                       | 2009                       | --                                             | RT (55Gy) 20#    | lung               | 58                         | Yes                  | 130                        | HR        | 2/31               | dc                   |
| 1               | F      | 57               | 2007                       | EB              | No            | R0               | no               | no                                             | --                       | --                         | --                                             | no               | no                 | --                         | no                   | 150                        | HR        | 0/8                | nd                   |
| 4               | F      | 52               | 2007                       | EB              | No            | R0               | no               | no                                             | --                       | --                         | --                                             | no               | no                 | --                         | no                   | 130                        | LR        | 0/16               | nd                   |
| 9               | F      | 47               | 2008                       | EB              | No            | R0               | no               | no                                             | --                       | --                         | --                                             | no               | no                 | --                         | no                   | 172                        | HR        | 0/7                | 0/12                 |
| 8               | M      | 33               | 2008                       | EB              | No            | R0               | no               | no                                             | --                       | --                         | --                                             | no               | no                 | --                         | no                   | 171                        | LR        | 0/3                | nd                   |
| 3               | M      | 40               | 2008                       | EB              | No            | R0               | no               | no                                             | --                       |                            | --                                             | no               | no                 | --                         | no                   | 134                        | LR        | 0/3                | 0/43                 |
| 10              | F      | 63               | 2009                       | EB              | Yes           | R0               | no               | no                                             | --                       |                            | --                                             | no               | no                 | --                         | no                   | 128                        | LR        | 0/9                | 0/23                 |
| 17 <sup>a</sup> | M      | 57               | 2010                       | LE              | No            | R1               | no               | Yes                                            | 29                       | 2013                       | No                                             | RT (60 Gy) 30#   | No                 | --                         | No                   | 137                        | HR        | nd                 | nd                   |
| 11              | M      | 37               | 2010                       | EB              | Yes           | R0               | no               | no                                             | --                       | --                         | --                                             | no               | no                 | --                         | no                   | 120                        | HR        | 0/10               | nd                   |
| 18 <sup>a</sup> | M      | 81               | 2010                       | LE              | No            | R1               | no               | Yes                                            | Persistent               | 2012                       | No                                             | RT (60 Gy) 30#   | No                 | --                         | No                   | 83 <sup>b</sup>            | HR        | nd                 | nd                   |
| 12              | F      | 75               | 2011                       | LE              | No            | R1               | RT (60 Gy) 30#   | no                                             | --                       | --                         | --                                             | no               | no                 | --                         | no                   | 123 <sup>b</sup>           | LR        | nd                 | nd                   |
| 16 <sup>a</sup> | F      | 63               | 2011                       | LE              | No            | R0               | no               | No                                             | --                       | --                         | --                                             | no               | No                 | --                         | No                   | 134                        | LR        | nd                 | nd                   |
| 19 <sup>a</sup> | F      | 64               | 2011                       | LE              | No            | R1               | no               | Yes                                            | 14                       | 2013                       | No                                             | no               | No                 | --                         | No                   | 127                        | LR        | nd                 | nd                   |
| 13              | F      | 54               | 2012                       | EB              | No            | R1               | RT (60 Gy) 30#   | no                                             | --                       | --                         | --                                             | no               | no                 | --                         | no                   | 117                        | LR        | 0/3                | 0/32                 |
| 14              | F      | 58               | 2013                       | EB              | Yes           | R0               | no               | no                                             | --                       | --                         | --                                             | no               | no                 | --                         | no                   | 104                        | HR        | 0/15               | nd                   |
| 6               | F      | 59               | 2013                       | EB              | No            | R0               | no               | no                                             | --                       | --                         | --                                             | no               | no                 | --                         | no                   | 63 <sup>b</sup>            | LR        | 0/3                | nd                   |
| 21              | F      | 81               | 2013                       | EB              | No            | R0               | no               | No                                             | --                       | --                         | --                                             | No               | No                 | --                         | No                   | 14 <sup>b</sup>            | LR        | 0/5                | nd                   |
| 22              | M      | 41               | 2014                       | LE              | No            | R0               | no               | No                                             | --                       | --                         | --                                             | No               | No                 | --                         | No                   | 95                         | HR        | 0/28               | nd                   |
| 23              | F      | 43               | 2014                       | EB              | No            | R1               | no               | No                                             | --                       | --                         | --                                             | No               | No                 | --                         | No                   | 82                         | HR        | nd                 | nd                   |
| 20              | F      | 46               | 2015                       | EB              | No            | R0               | no               | No                                             | --                       | --                         | --                                             | No               | No                 | --                         | No                   | 75                         | LR        | nd                 | nd                   |
| 24              | F      | 82               | 2016                       | LE              | No            | R0               | no               | No                                             | --                       | --                         | --                                             | No               | No                 | --                         | No                   | 61                         | HR        | 0/5                | nd                   |
| 25              | M      | 71               | 2018                       | EB              | No            | R0               | no               | No                                             | --                       | --                         | --                                             | No               | No                 | --                         | No                   | 49                         | LR        | 0/12               | nd                   |

High Risk (HR)  
Low Risk (LR)  
nd: lymph node dissection not done  
(+/total): positive lymph node on histology over total excised  
*en bloc* (EB), Local excision (LE), Recurrent laryngeal nerve (RLN)  
RT: radiotherapy  
#: fractions  
Patient 15 was operated on in 1996 by another surgeon at the centre.  
Patient 12, 22, 24 were not suspected to have cancer and underwent local excision alone  
<sup>a</sup>: Patient had initial surgery elsewhere and were operated for recurrence at KCH  
<sup>b</sup>: Patient died due to other causes
