# Supplementary material for: Margin Free Resection Achieves Excellent Long Term Outcomes in Parathyroid Cancer
Source: MDPI journal article supplement (doi:10.3390/cancers15010199), 2022-12-29
Supplement: s1 [file s1]

**Supplementary Table S2: Outcome in single centre series of parathyroid cancer**

| Year | Lead author    | ref  | type   | n  | Follow-up<br>-at 5 years<br>-median/mean | OS<br>5-year          | RFS<br>5-year          | DSS<br>5-year         | OS<br>10-year <sup>a</sup> | RFS<br>10-year <sup>b</sup> | DSS<br>10-year        |
|------|----------------|------|--------|----|------------------------------------------|-----------------------|------------------------|-----------------------|----------------------------|-----------------------------|-----------------------|
| 1992 | Wynne          | [28] | single | 43 | 43<br>mean: 6.9y                         | 69%                   | -                      | -                     | -                          | -                           | -                     |
| 1998 | Chow           | [29] | single | 10 | 5                                        | 5/5<br>100%           | 4/5<br>80%             | 4/5<br>80%            | 4/4<br>100%                | -                           | -                     |
| 2001 | Dotzenrath     | [30] | single | 4  | 2                                        | 2/2<br>100%           | 0/2                    | 2/2<br>100%           | 2/2<br>100%                | 0/2                         | 2/2<br>100%           |
| 2003 | Munson         | [31] | single | 61 | 57                                       | 44/57<br>76.9%        | 32/57<br>56.6%         | 47/57<br>82.0%        | -                          | -                           | -                     |
| 2004 | Busaidy        | [32] | single | 27 | 24                                       | 19/24<br>79.2%        | 14/24<br>58.3%         | 20/24<br>83.3%        | 8/17<br>47.1%              | 5/17<br>29.4%               | 12/17<br>70.6%        |
| 2007 | Iihara         | [33] | single | 38 | 38                                       | 35/38<br>92.1%        | 28/38<br>73.7%         | 35/38<br>92.1%        | 34/38<br>89.5              | 12/38<br>72.2%              | 34/38<br>72.2%        |
| 2011 | Harari         | [9]  | single | 37 |                                          | 78.3%                 |                        |                       | 66.7%                      |                             |                       |
| 2012 | Karakas        | [34] | single | 19 | 19                                       | 18/19<br>93%          | 7/19<br>36.8%          |                       | 8/19<br>43%                |                             |                       |
| 2015 | Basceken       | [35] | single | 11 | 9                                        | 8/9<br>88.9%          | 8/9<br>88.9%           | 8/9<br>88.9%          | 5/6<br>83.3%               | 5/6<br>83.3%                | 5/6<br>83.3%          |
| 2016 | Xue            | [36] | single | 40 | 5y: n.a.<br>median: 4.1y                 | 78.9%                 |                        |                       | 60.7%                      |                             |                       |
| 2017 | Silva-Figueroa | [38] | single | 68 | 68                                       | 54/68<br>80%          | 42/68<br>62%           | n.a.                  | 46/68<br>68%               | 35/68<br>51%                | n.a.                  |
| 2017 | LIBÁNSKÝ       | [37] | single | 16 | 16                                       | 16/16<br>100%         | 12/16<br>75%           | 16/16<br>100%         | -                          | -                           | -                     |
| 2019 | Asare          | [39] | single | 27 | 5y: n.a.<br>median: 6.4y                 | 78%                   |                        |                       | 61%                        |                             |                       |
| 2020 | Zheng          | [40] | single | 7  | 7                                        | 6/7<br>85.7%          | 6/7<br>85.7%           | 7/7<br>100%           | -                          | -                           | -                     |
| 2021 | De Pasquale    | [41] | single | 8  | 5y: n.a.<br>mean: 3.2y                   | n.a.                  | -                      | -                     | -                          | -                           | -                     |
| 2021 | Sali           | [42] | single | 20 | 5y:n.a.<br>median: 21.5                  | n.a.                  |                        |                       | n.a.                       |                             |                       |
| 2022 | Cunha          | [43] | single | 17 | 5y: 64.7%                                | 8/11<br>72.7%         | 4/12<br>33.2%          | 10/11<br>90.9%        | 8/10<br>80.0%              | 3/10<br>30.0%               | 8/9<br>88.9%          |
| 2022 | Wei            | [44] | single | 31 | 31                                       | 50%                   | -                      | -                     | -                          | -                           | -                     |
|      | <b>all</b>     |      |        |    |                                          | <b>50.0-<br/>100%</b> | <b>33.2-<br/>88.9%</b> | <b>80.0-<br/>100%</b> | <b>43.0-<br/>100%</b>      | <b>29.4-<br/>83.0%</b>      | <b>72.0-<br/>100%</b> |
|      |                |      |        |    |                                          |                       |                        |                       |                            |                             |                       |
|      | <b>median</b>  |      |        |    |                                          | <b>79.2%</b>          | <b>62.0%</b>           | <b>90.9%</b>          | <b>68.0%</b>               | <b>51.0%</b>                | <b>83.3%</b>          |
| 2022 | Schulte        |      | single | 25 | 24                                       | 23/24<br>95.8%        | 19/23<br>82.6%         | 19/19<br>100%         | 16/19<br>84.2%             | 15/19<br>79.0%              | 23/23<br>100%         |

a Denominator: n patients who died of any cause or have a follow-up of 10 years; numerator: n patients alive patients at FU of at least 120 months

b Denominator: n patients who died of any cause or have a follow-up of 10 years; numerator: n patients D/other or alive at FU of at least 120 months without recurrence
