# Supplementary material for: Margin Free Resection Achieves Excellent Long Term Outcomes in Parathyroid Cancer
Source: Cancers (Basel). 2022 Dec 29;15(1):199. doi: 10.3390/cancers15010199 (PMC9818355; doi:10.3390/cancers15010199)
Supplement: Supplementary file 1 [file cancers-15-00199-s001.zip]

Archive with 4 entries (4 files):
- cancers-2049110-Supplementary Figure S1 PRISMA 2009 flow diagram.pdf
- cancers-2049110-Supplementary Table S2.pdf
- cancers-2049110-Supplementary Table S3.pdf
- cancers-2049110-Supplementary_Table_S1_Patient cohort.pdf
