# Supplementary figures and images for: Margin Free Resection Achieves Excellent Long Term Outcomes in Parathyroid Cancer
Source: MDPI journal article supplement (doi:10.3390/cancers15010199), 2022-12-29

Supplementary Figure S1: PRISMA Flow Diagram

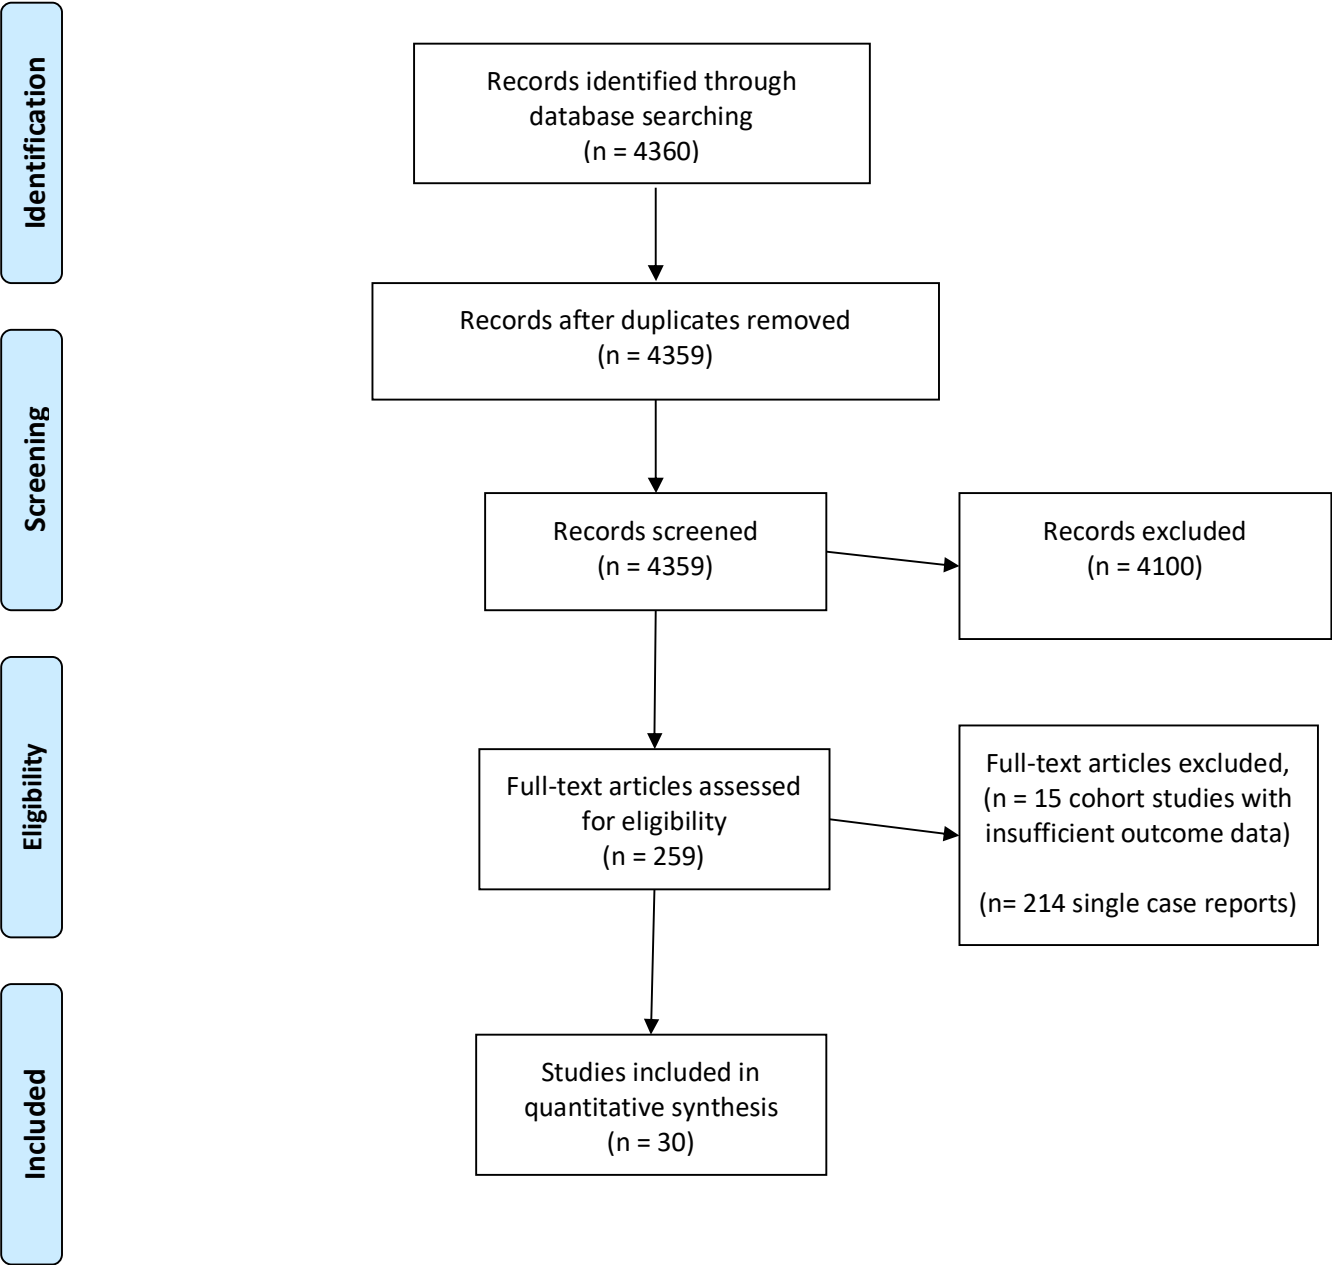

Supplement: s1 [file s1]
